# Supplementary material for: Quantitative Polymerase Chain Reaction System for Alongshan Virus Detection
Source: MDPI journal article supplement (doi:10.3390/mps6050079), 2023-09-04
Supplement: s1 [file s1]

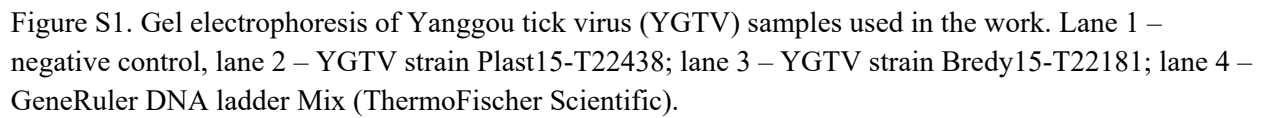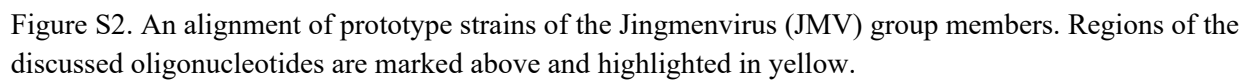

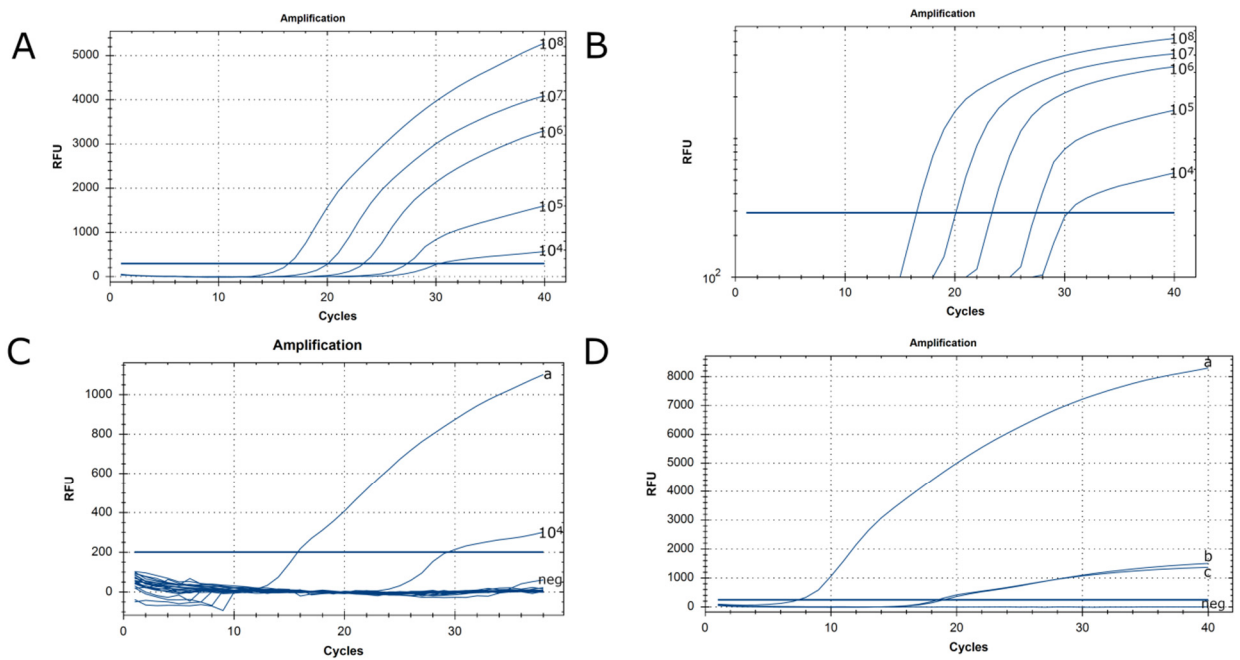

Figure S3. Examples of the amplification curves produced via an Alongshan virus qPCR. A. Amplification curves of the standard RNA samples. B. Amplification curves of the standard RNA samples (logarithmic fluorescence scale). C. Amplification curve of the strain Miass519 (a), compared with  $10^4$  standard RNA sample and multiple non-amplifying samples (neg). D. Amplification curve of the strain Miass527 (a), as well as 100 µl sera samples (b, c) spiked with 25 µl of the ALSV strain Miass519 ( $9.7 \times 10^7$  RNA copies/µl), and multiple non-amplifying samples (neg).

Table S1. Oligonucleotides used for internal control Poliovirus RT-qPCR.

| Oligonucleotide | Sequence                                 |
|-----------------|------------------------------------------|
| PVR1            | 5'-CGAACGTGATCCTGAGTGTT-3'               |
| PVP1            | (ROX)-TTGATTCATGAATTTCTTCATTGGCA-(BHQ-2) |
| PVL1            | 5'-GGCAGACGAGAAATACCCAT-3'               |

Table S2. Amplification cycle for ALSV qPCR.

| Amplification step | Instruction                   |
|--------------------|-------------------------------|
| 1                  | <b>Hold</b> , 95C, 3 min      |
| 2                  | <b>Hold</b> , 95C, 10 seconds |
| 3                  | <b>Hold</b> , 58C, 30 seconds |
| 4                  | <b>Plate read</b>             |
| 5                  | <b>Goto</b> 2, 39 times       |

Table S3. Amplification cycle for Poliovirus qPCR.

| Amplification | Instruction |
|---------------|-------------|
|---------------|-------------|

| <b>step</b> |                               |
|-------------|-------------------------------|
| 1           | <b>Hold</b> , 95C, 5 min      |
| 2           | <b>Hold</b> , 95C, 15 seconds |
| 3           | <b>Hold</b> , 60C, 45 seconds |
| 4           | <b>Plate read</b>             |
| 5           | <b>Goto</b> 2, 42 times       |
